# Supplementary material for: LncRNA DGCR5 plays a tumor-suppressive role in glioma via the miR-21/Smad7 and miR-23a/PTEN axes
Source: publisher site journal article supplement (doi:10.18632/aging.103800), 2020-10-21
Supplement: Supplementary file [file aging-v12i20-103800-supplementary-material-SD1.pdf]

**SUPPLEMENTARY FIGURES**

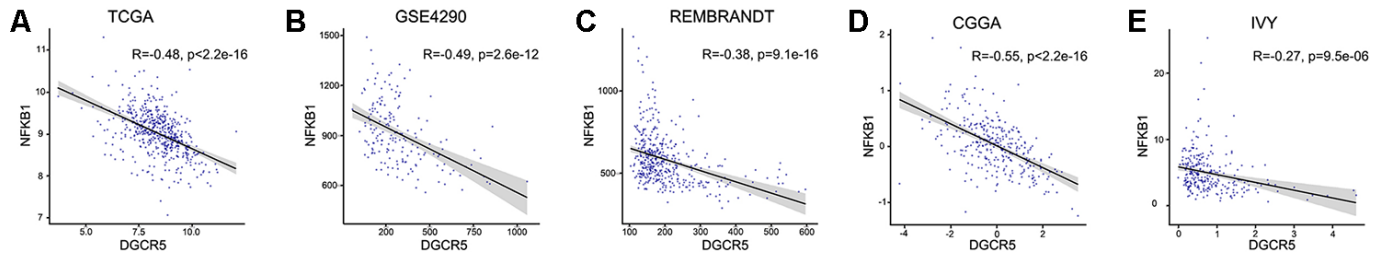

**Supplementary Figure 1.** Correlation between DGCR5 and NF-κB1 according to (A) TCGA data, (B) GSE4290, (C) REMBRANDT, (D) CGGA, and (E) IVY.

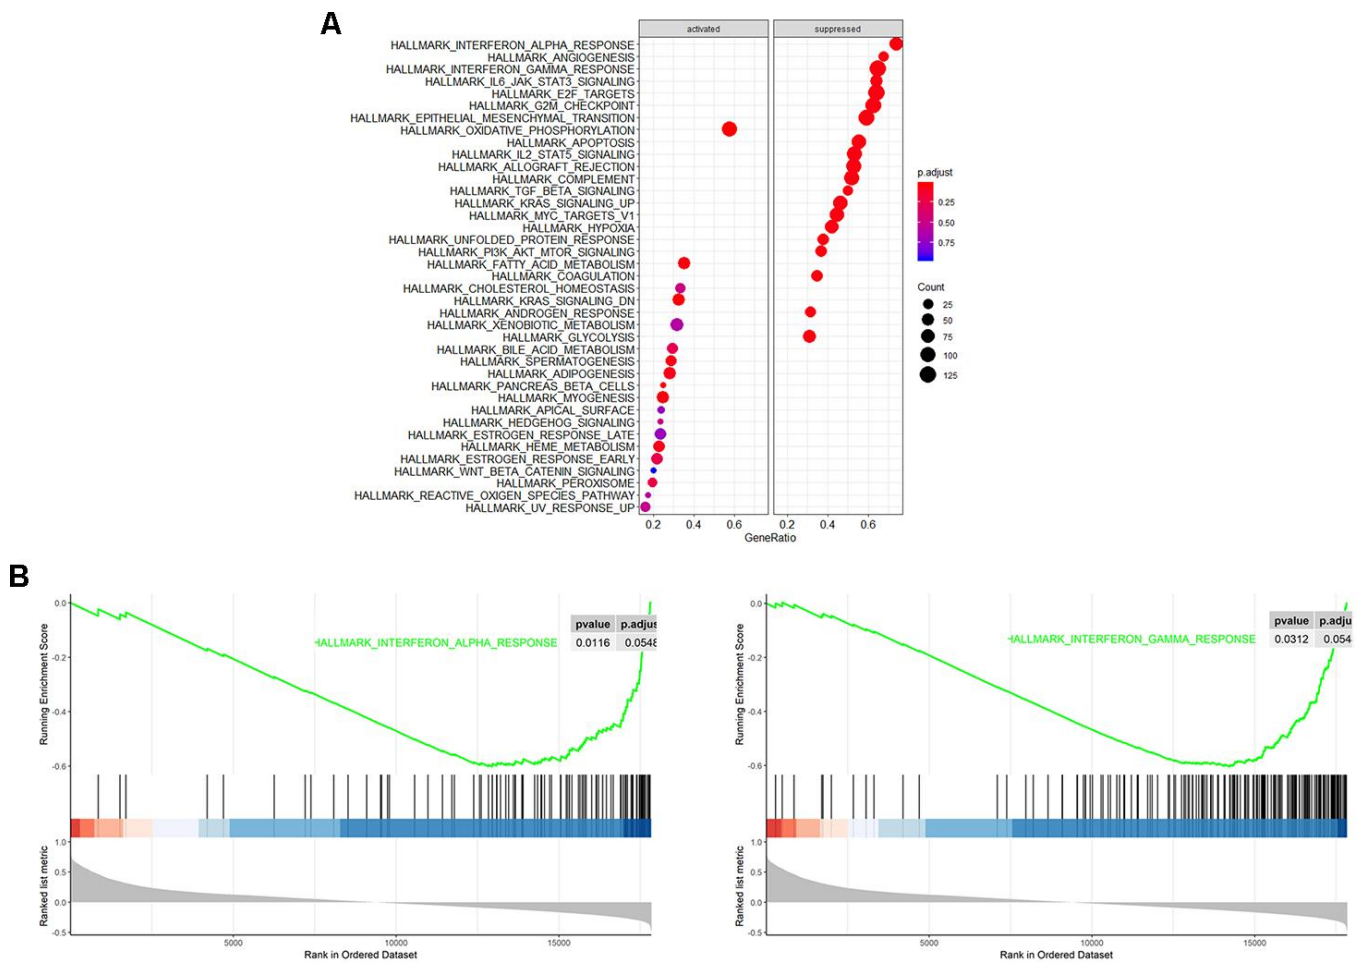

**Supplementary Figure 2.** Kyoto Encyclopedia of Genes and Genomes (KEGG) (A) and Gene Set Enrichment Analysis (GSEA) (B) on DGCR5.

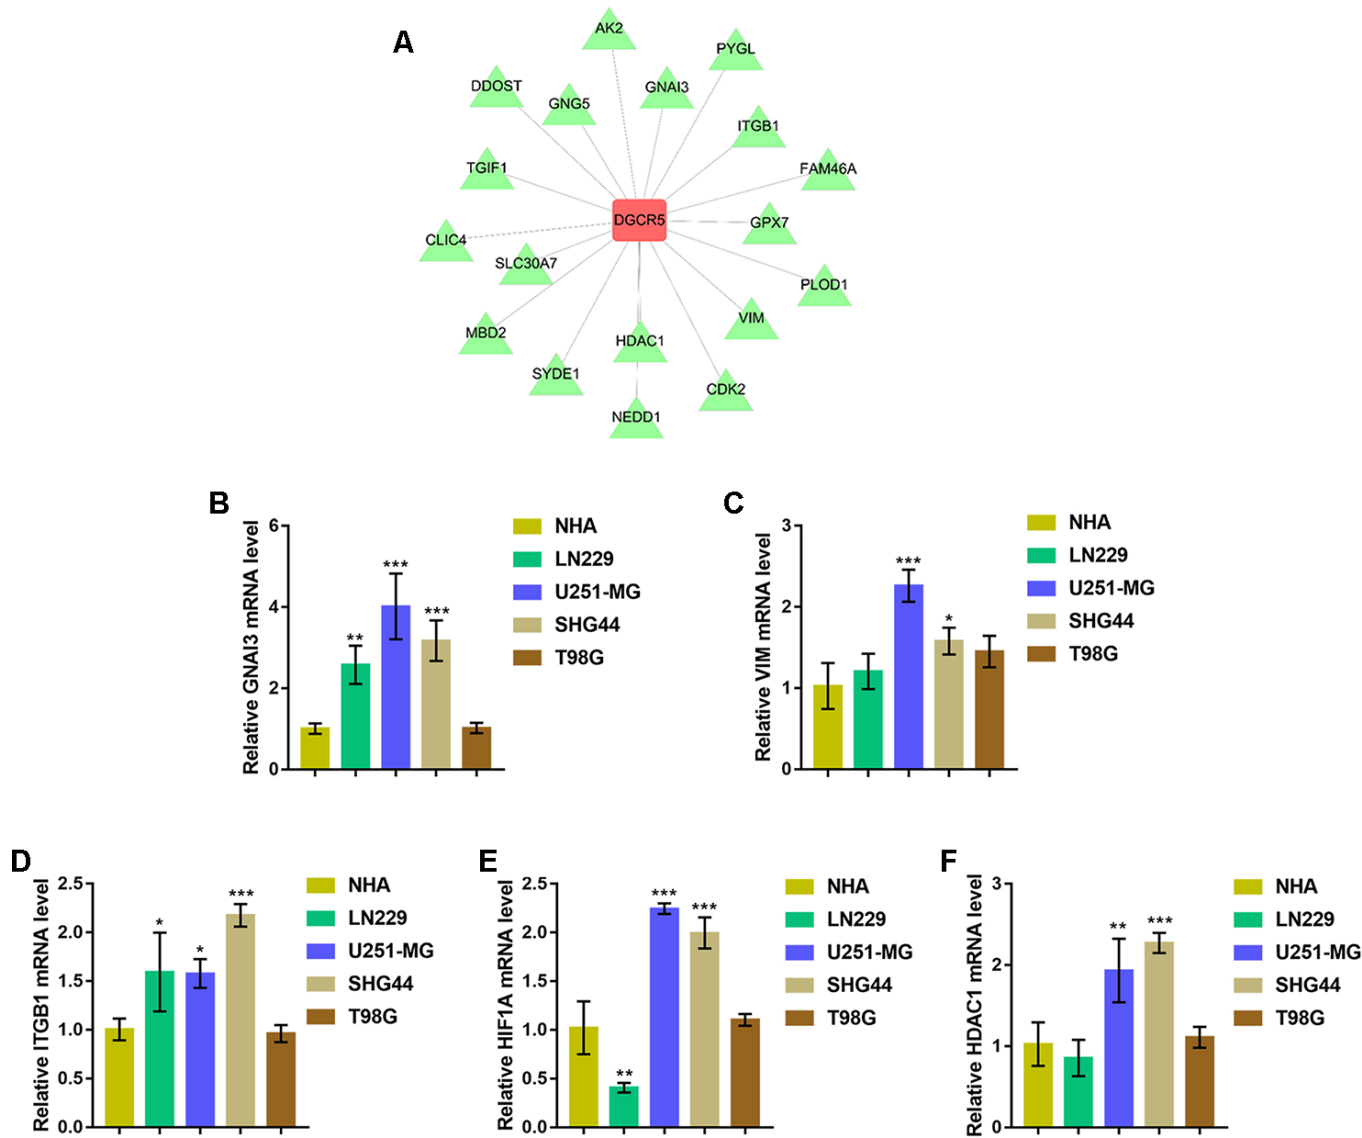

**Supplementary Figure 3.** Co-expression network consists of DGCR5 and its negatively-correlated genes (A) Co-expression network consists of DGCR5 and its negatively-correlated genes. (B–F) Expression of genes negatively-correlated with DGCR5 in NHA, LN229, U251-MG, SHG44, and T98G cells. \* $P < 0.05$ , \*\* $P < 0.01$ , \*\*\* $P < 0.005$ .

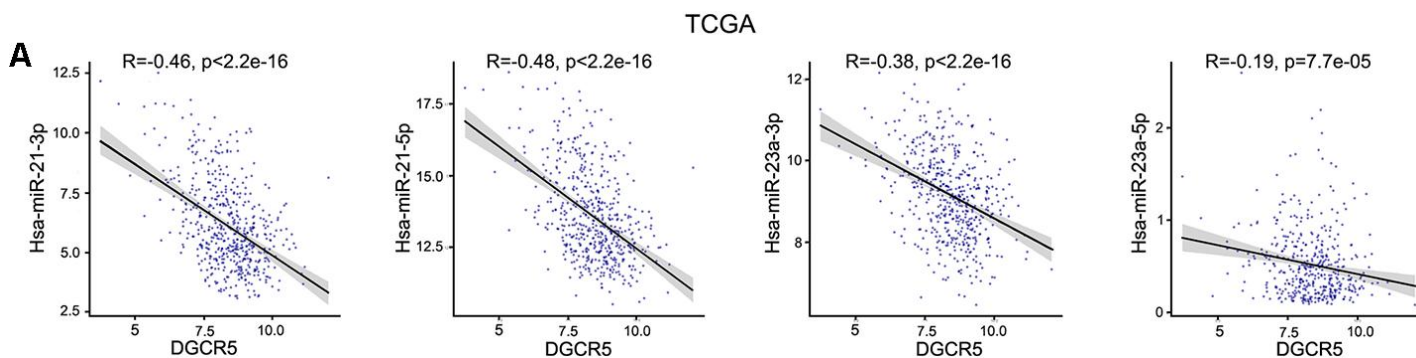

**Supplementary Figure 4.** Correlation between DGCR5, miR-21, and miR-23a according to TCGA data.

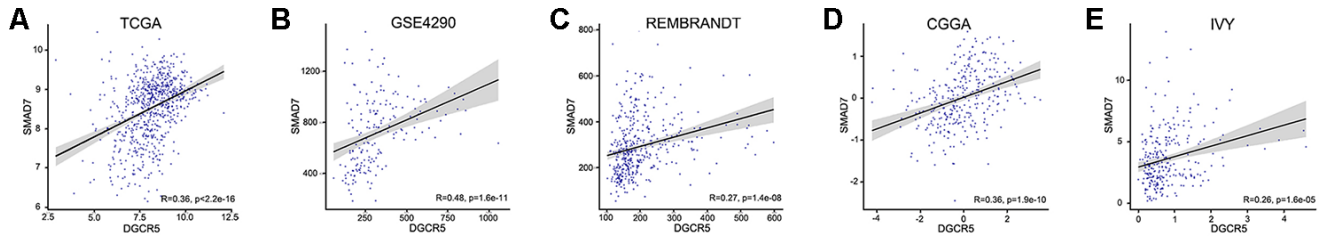

**Supplementary Figure 5.** Correlation between DGCR5 and Smad7 according to (A) TCGA data, (B) GSE4290, (C) REMBRANDT, (D) CGGA, and (E) IVY.

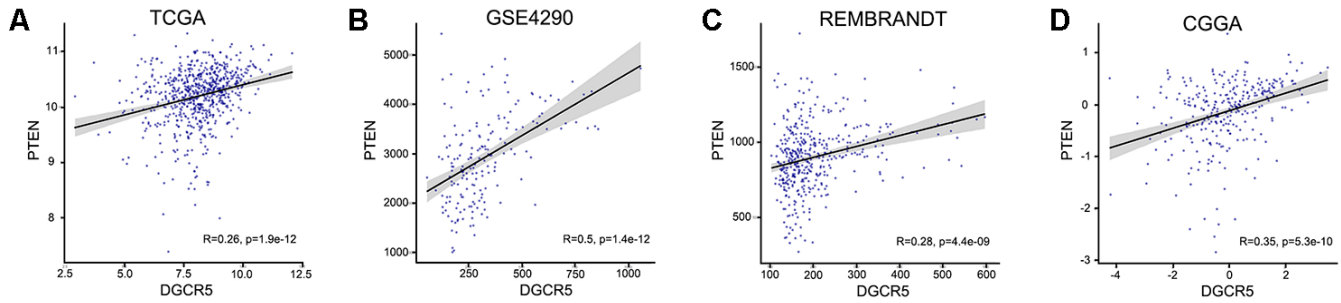

**Supplementary Figure 6.** Correlation between DGCR5 and PTEN according to (A) TCGA data, (B) GSE4290, (C) REMBRANDT, and (D) CGGA.
